# Supplementary material for: Choroidal vascularity index in type-2 diabetes analyzed by swept-source optical coherence tomography
Source: PubMed Central journal article supplement (PMC5758605; doi:10.1038/s41598-017-18511-7), 2018-01-08
Supplement: 41598_2017_18511_MOESM1_ESM.pdf [file 41598_2017_18511_MOESM1_ESM.pdf]

## Choroidal vascularity index in type-2 diabetes analyzed by swept-source optical coherence tomography

Mirinae Kim,<sup>1</sup> Min Ji Ha,<sup>1</sup> Seung Yong Choi,<sup>1</sup> Young-Hoon Park<sup>1,2\*</sup>

<sup>1</sup>Department of Ophthalmology and Visual Science, College of Medicine, The Catholic University of Korea, Seoul, Republic of Korea (M.K., M.J.H., S.Y.C., Y.H.P.);

<sup>2</sup>Catholic Institute for Visual Science, College of Medicine, The Catholic University of Korea, Seoul, Korea (Y.H.P)

**Supplementary Table.** The retinal and choroidal thicknesses, and choroidal vascularity index (CVI) by group

| Variables                        | Healthy controls<br>(n = 45) | No DR<br>(n = 30) | Mild or moderate NPDR<br>(n = 41) | Severe NPDR<br>(n = 40) | PDR<br>(n = 8) | PRP treated DR<br>(n = 35) | CSME<br>(n = 31) |
|----------------------------------|------------------------------|-------------------|-----------------------------------|-------------------------|----------------|----------------------------|------------------|
| CVI (%)                          | 69.08±2.29                   | 67.07±3.71        | 66.28±2.70                        | 66.20±2.56              | 63.48±2.89     | 65.38±3.15                 | 66.28±2.85       |
| Retinal thickness (ETDRS sector) |                              |                   |                                   |                         |                |                            |                  |
| Central                          | 221.29±20.42                 | 230.40±15.17      | 236.29±23.68                      | 237.83±22.08            | 237.13±35.93   | 245.86±39.58               | 307.48±81.74     |
| Inner superior                   | 311.89±16.84                 | 309.03±15.95      | 311.46±15.40                      | 318.75±27.89            | 317.25±26.46   | 309.87±25.42               | 354.77±60.19     |
| Inner nasal                      | 311.31±19.36                 | 309.23±15.50      | 311.61±17.24                      | 312.80±24.21            | 315.13±30.94   | 312.00±29.66               | 351.19±58.12     |
| Inner inferior                   | 309.29±16.61                 | 306.53±14.89      | 308.90±16.10                      | 311.03±23.99            | 308.25±32.48   | 310.09±28.38               | 344.55±36.43     |
| Inner temporal                   | 299.87±14.68                 | 299.03±15.83      | 303.73±14.39                      | 306.35±21.69            | 302.25±27.43   | 307.11±31.69               | 357.77±59.69     |
| Outer superior                   | 277.40±12.97                 | 270.57±14.55      | 275.73±15.11                      | 290.15±37.59            | 296.88±38.26   | 284.14±3.79                | 324.13±42.88     |
| Outer nasal                      | 292.71±18.06                 | 287.07±13.96      | 286.83±13.90                      | 295.03±31.41            | 304.25±23.25   | 302.09±28.96               | 326.06±44.57     |

|                                    |              |              |              |              |              |              |              |
|------------------------------------|--------------|--------------|--------------|--------------|--------------|--------------|--------------|
| Outer inferior                     | 263.84±12.13 | 255.67±13.61 | 258.93±13.61 | 271.35±28.51 | 267.38±22.64 | 274.34±25.29 | 296.10±30.89 |
| Outer temporal                     | 262.76±11.36 | 260.00±25.98 | 264.02±17.72 | 276.38±37.32 | 270.63±23.81 | 280.29±31.85 | 326.39±62.53 |
| Mean all sectors                   | 283.37±13.59 | 280.84±13.80 | 284.17±12.88 | 291.07±24.16 | 291.01±25.79 | 291.76±23.42 | 332.05±37.15 |
| Choroidal thickness (ETDRS sector) |              |              |              |              |              |              |              |
| Central                            | 267.27±87.42 | 216.00±90.11 | 241.03±77.52 | 241.11±81.14 | 202.13±60.92 | 229.68±78.85 | 252.84±88.63 |
| Inner superior                     | 255.27±78.19 | 208.88±82.33 | 242.03±70.25 | 233.60±78.23 | 201.75±54.94 | 226.13±80.81 | 260.29±89.70 |
| Inner nasal                        | 250.06±93.99 | 201.00±89.66 | 222.63±82.91 | 238.22±81.42 | 181.25±65.87 | 223.36±88.87 | 244.90±91.23 |
| Inner inferior                     | 274.27±88.96 | 211.21±86.13 | 229.29±90.28 | 250.51±85.24 | 197.50±63.88 | 224.94±81.35 | 248.32±92.44 |
| Inner temporal                     | 264.77±76.22 | 209.88±78.26 | 243.14±73.00 | 232.03±72.84 | 204.50±53.33 | 218.61±69.96 | 245.87±79.59 |
| Outer superior                     | 237.41±83.36 | 198.88±70.27 | 226.09±83.64 | 214.65±69.19 | 211.63±52.77 | 212.84±79.49 | 239.61±73.89 |
| Outer nasal                        | 195.53±91.59 | 162.63±82.28 | 174.34±78.65 | 193.05±73.72 | 141.63±63.45 | 183.55±87.69 | 205.74±82.73 |
| Outer inferior                     | 248.62±89.90 | 196.38±77.56 | 218.17±80.96 | 233.00±83.82 | 193.25±54.13 | 205.13±77.48 | 221.97±89.06 |
| Outer temporal                     | 239.32±67.16 | 197.58±66.61 | 222.03±65.07 | 211.87±70.33 | 203.25±38.89 | 191.74±63.64 | 223.07±85.36 |
| Mean all sectors                   | 248.06±77.76 | 200.27±76.89 | 224.31±73.33 | 227.56±70.22 | 192.99±52.62 | 212.86±73.35 | 238.07±78.73 |
| Subfoveal choroidal thickness      | 320.00±77.92 | 258.13±89.02 | 310.22±72.41 | 304.53±69.26 | 258.75±73.29 | 276.29±79.51 | 312.58±89.59 |

Data are expressed as mean ± standard deviation (95% confidence interval).

CSME, clinically significant macular edema; CVI, choroidal vascularity index; DR, diabetic retinopathy; NPDR, non-proliferative diabetic retinopathy; PDR, proliferative retinopathy; PRP, panretinal photocoagulation.
